# Supplementary material
Source: PubMed Central journal article supplement (PMC2740555)

## Supplemental TABLE 1

Primers used in this study.

| Primer name | Sequence                                                       |
|-------------|----------------------------------------------------------------|
| LBb1        | 5'-CGCACCTGGCGAACGACGTTGA-3'                                   |
| AtHOL1/2-1  | 5'-GACGTCGTGTCTCCRCCACAGC-3'                                   |
| AtHOL1-2    | 5'-TCTAGACAACCTTCAAGACCCCAAAA-3'                               |
| AtHOL1-3    | 5'-CTCGAGCAACATTGAAACATACATAGAGCA-3'                           |
| AtHOL2-2    | 5'-ACTAGTGCTTGAAGCTTCCCACAACCT-3'                              |
| AtHOL2-3    | 5'-CTCGAGGCGTACGTAGACGCTGGT-3'                                 |
| AtHOL2-8    | 5'-GGAAAGGAGAACTTTATTAACCTGA-3'                                |
| AtHOL2-9    | 5'-CTCTTATGTATCCGATGACCG-3'                                    |
| AtHOL3-2    | 5'-ACTAGTCGTCGCTGATTTGTTTG-3'                                  |
| AtHOL3-3    | 5'-CTCGAGTGACAAATTCACAAAACATCCA-3'                             |
| atB2T19VN   | 5'-GGGGACAACCTTTGTACAAGAAAGTTGGGTTTTTTTTTTTTTTTTTTTTTTTTTVN-3' |
| AtPP2AA3-1  | 5'-TAACGTGGCCAAAATGATGC-3'                                     |
| AtPP2AA3-2  | 5'-GTTCTCCACAACCGCTTGGT-3'                                     |

R = A or G; V = A, G or C; N = A, T, G, or C.

# Supplemental FIGURE S1

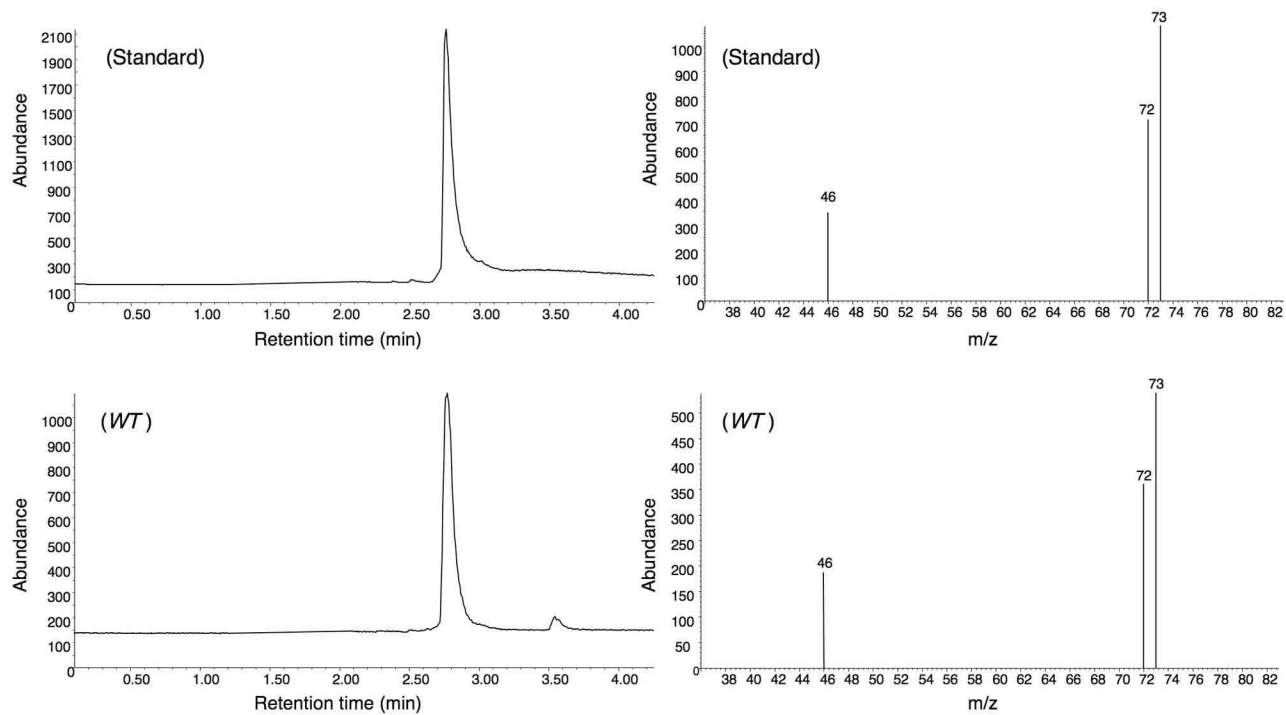

# Supplemental FIGURE S2

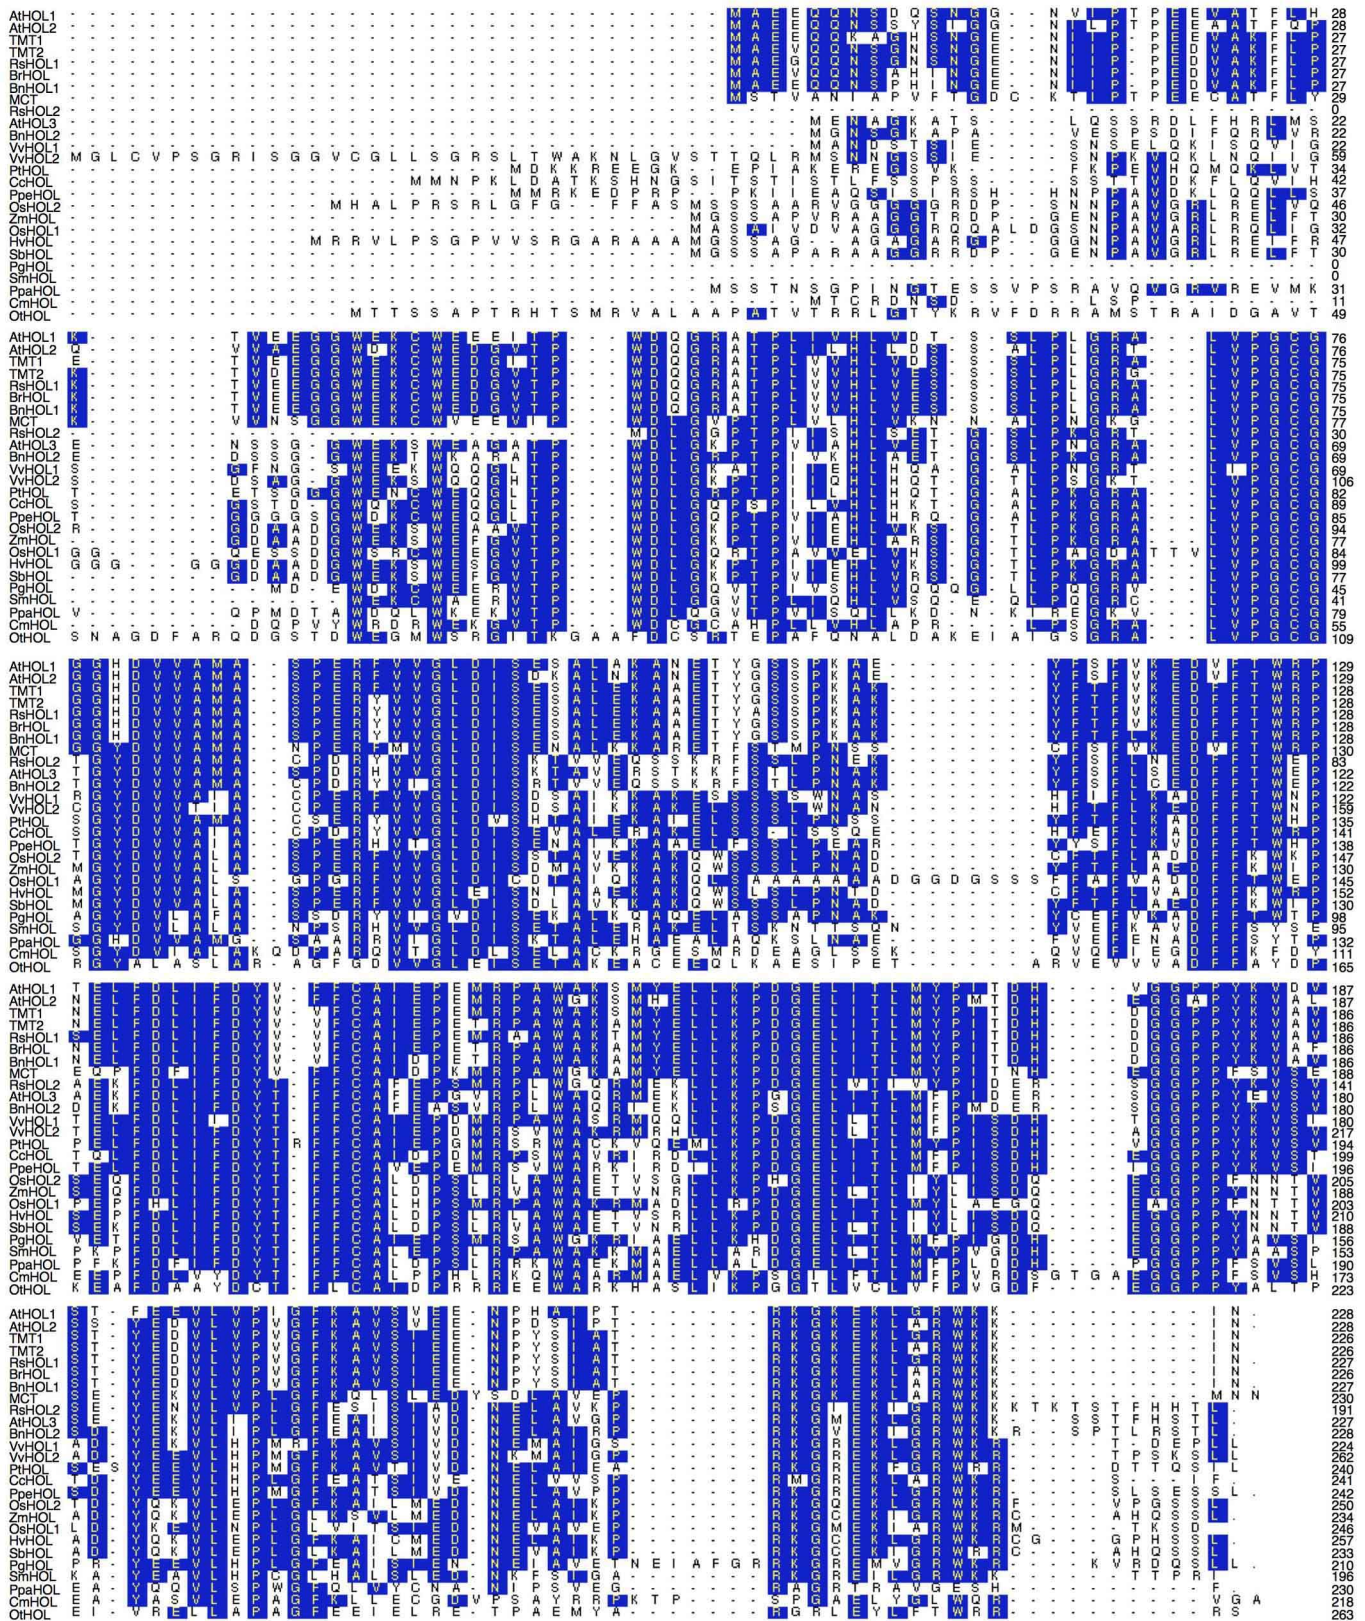





Supplemental FIGURE S4

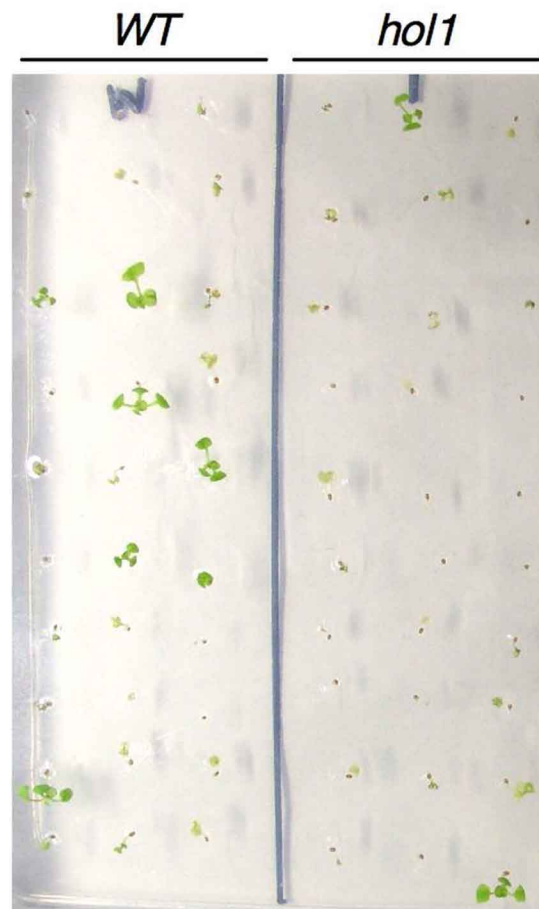

Supplement: supp_M109.001032_jbc.M109.001032-1.pdf [file supp_M109.001032_jbc.M109.001032-1.pdf]
